# Supplementary material for: Skin-Derived C-Terminal Filaggrin-2 Fragments Are Pseudomonas aeruginosa-Directed Antimicrobials Targeting Bacterial Replication
Source: PubMed Central journal article supplement (PMC4570713; doi:10.1371/journal.ppat.1005159), 2015-09-15
Supplement: ppat.1005159.s001.pdf [file ppat.1005159.s001.pdf]

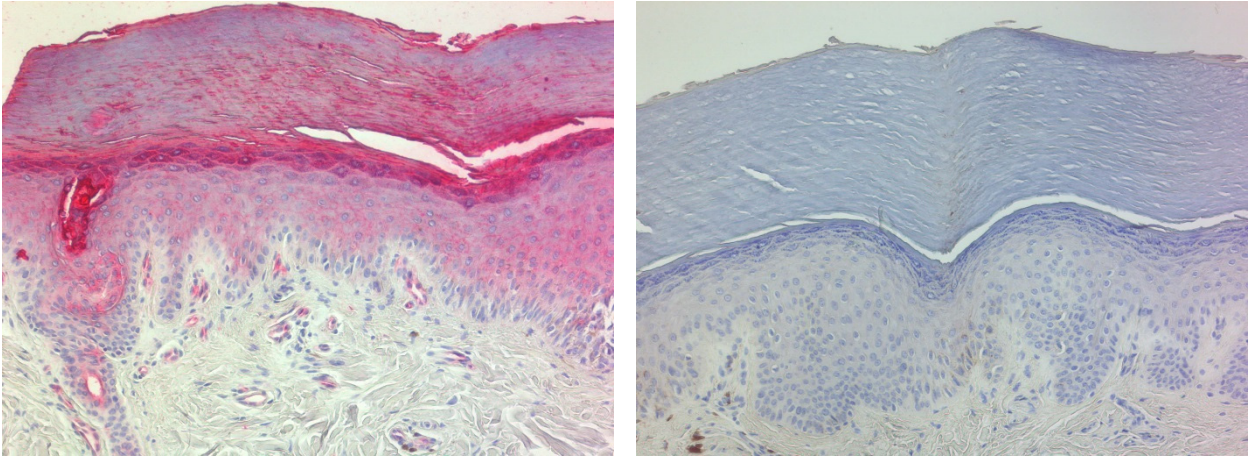

S1 Fig.: Localization of filaggrin-2 in human epidermis. Immunohistochemical analyses of FLG2 in human skin sections. Healthy skin sections from palmar sites were stained with anti-FLG2-4 antibody (left panel). Specificity of antibody was confirmed by blocking the antibody with the antigen (right panel).
