# Supplementary material for: Skin-Derived C-Terminal Filaggrin-2 Fragments Are Pseudomonas aeruginosa-Directed Antimicrobials Targeting Bacterial Replication
Source: PubMed Central journal article supplement (PMC4570713; doi:10.1371/journal.ppat.1005159), 2015-09-15
Supplement: ppat.1005159.s002.pdf [file ppat.1005159.s002.pdf]

untreated

FLG2-4 treated

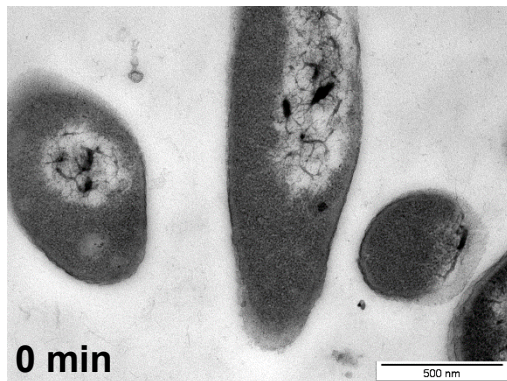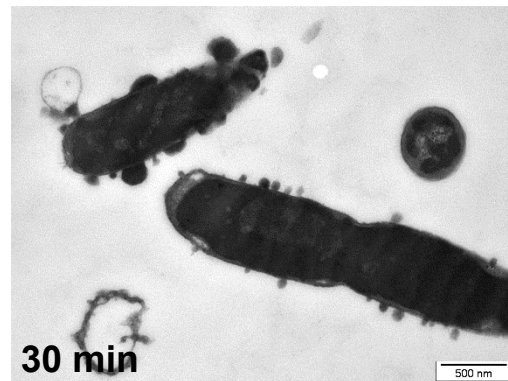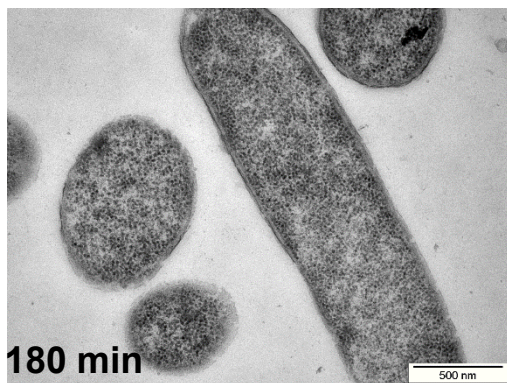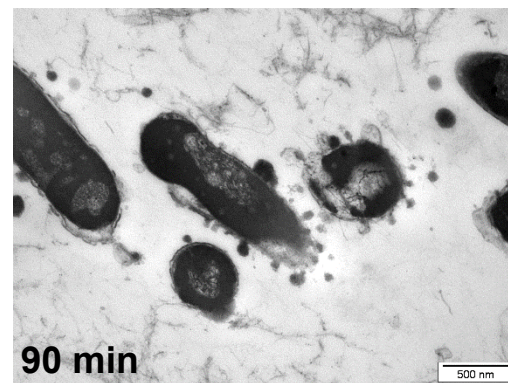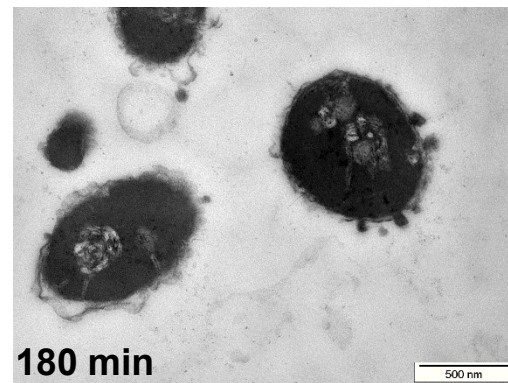

S2 Fig.: **Effect of FLG2-4 on *P. aeruginosa*.** Electron microscopy images of *P. aeruginosa* treated with FLG2-4 for the indicated time periods (right panel). Left panel: untreated controls.
