# Supplementary material for: Skin-Derived C-Terminal Filaggrin-2 Fragments Are Pseudomonas aeruginosa-Directed Antimicrobials Targeting Bacterial Replication
Source: PubMed Central journal article supplement (PMC4570713; doi:10.1371/journal.ppat.1005159), 2015-09-15
Supplement: ppat.1005159.s006.pdf [file ppat.1005159.s006.pdf]

S1 Table: Antimicrobial activity of FLG2-4 tested against various *Pseudomonas* strains, cystic fibrosis clinical isolates, and different Pseudomonads in the radial diffusion assay. The MEC is defined as the “minimal effective concentration” by the x-axis intercept in the graphical analyses of radial diffusion assays. The MECs stated represent the x-axis intercept of a regression calculated over all measured clearing zone units, the 95% confidence interval is indicated in parentheses; n=3-12. Shaded gray: turbid clearing zones.

| radial diffusion assay             |                |                                      |                |                                      |                 |
|------------------------------------|----------------|--------------------------------------|----------------|--------------------------------------|-----------------|
| other <i>Pseudomonas</i>           | MEC [ $\mu$ M] | clinical <i>Pseudomonas</i> isolates | MEC [ $\mu$ M] | other Pseudomonads                   | MEC [ $\mu$ M]  |
| <i>P. aeruginosa</i><br>ATCC 10145 | 0.7 (0.2-1.5)  | CF 636                               | 0.9 (0.1-2.3)  | <i>P. stutzeri</i><br>RV A2/1990     | 0.3 (0.2-0.5)   |
| <i>P. aeruginosa</i><br>ATCC 33348 | 1.0 (0.8-1.2)  | CF 640                               | 0.1 (0.02-0.4) | <i>P. syringae</i><br>ATCC 10205     | 0.9 (0.3-1.8)   |
| <i>P. aeruginosa</i><br>ATCC 33358 | 1.1 (0.1-2.9)  | CF 645                               | 0.3 (0.1-0.5)  | <i>P. paucimobilis</i><br>RV A2/1994 | 1.9 (1.2-2.6)   |
| <i>P. aeruginosa</i><br>ATCC 39324 | 0.1 (0.05-0.3) | CF 646                               | 0.4 (0.02-1.2) | <i>P. fluorescens</i><br>ATCC 49323  | 0.2 (0.001-1.2) |
| <i>P. aeruginosa</i><br>PAO1       | 0.7 (0.2-1.5)  |                                      |                | <i>P. putida</i><br>RV A1/2000       | 7.0 (1.0-12.7)  |
