# Supplementary material for: Skin-Derived C-Terminal Filaggrin-2 Fragments Are Pseudomonas aeruginosa-Directed Antimicrobials Targeting Bacterial Replication
Source: PubMed Central journal article supplement (PMC4570713; doi:10.1371/journal.ppat.1005159), 2015-09-15
Supplement: ppat.1005159.s007.pdf [file ppat.1005159.s007.pdf]

S2 Table: Antimicrobial activity of FLG2-4 tested against various bacterial strains in the radial diffusion assay. The results are displayed as the mean clearing zone units  $\pm$  SD (in parentheses) at the highest used concentrations of FLG2-4 (63.0 $\mu$ M); n=3-12.

radial diffusion assay of FLG2-4

| strain                             | clearing zone units | strain                             | clearing zone units | strain                           | clearing zone units | strain                               | clearing zone units |
|------------------------------------|---------------------|------------------------------------|---------------------|----------------------------------|---------------------|--------------------------------------|---------------------|
| <i>E. coli</i><br>ATCC 11775       | 32.9 ( $\pm$ 3.3)   | <i>P. aeruginosa</i><br>ATCC 33358 | 15.8 ( $\pm$ 4.9)   | CF 640                           | 31.7 ( $\pm$ 2.9)   | <i>P. syringae</i><br>ATCC 10205     | 37.0 ( $\pm$ 9.7)   |
| <i>P. aeruginosa</i><br>ATCC 33354 | 39.6 ( $\pm$ 4.5)   | <i>P. aeruginosa</i><br>ATCC 39324 | 25.8 ( $\pm$ 6.6)   | CF 645                           | 53.3 ( $\pm$ 2.9)   | <i>P. paucimobilis</i><br>RV A2/1994 | 45.8 ( $\pm$ 2.0)   |
| <i>P. aeruginosa</i><br>ATCC 10145 | 27.5 ( $\pm$ 2.7)   | <i>P. aeruginosa</i><br>PAO1       | 32.5 ( $\pm$ 6.5)   | CF 646                           | 26.3 ( $\pm$ 4.8)   | <i>P. fluorescens</i><br>ATCC 49323  | 22.5 ( $\pm$ 5.0)   |
| <i>P. aeruginosa</i><br>ATCC 33348 | 35.0 ( $\pm$ 2.5)   | CF 636                             | 28.3 ( $\pm$ 2.9)   | <i>P. stutzeri</i><br>RV A2/1990 | 61.7 ( $\pm$ 9.7)   | <i>P. putida</i><br>RV A1/2000       | 21.3 ( $\pm$ 5.8)   |
